# Supplementary material for: Refining Mn–Ni synergy for the design of efficient catalysts in electrochemical ethanol oxidation
Source: Royal Society of Chemistry journal article supplement (doi:10.1039/d4nj03313b), 2024-01-01
Supplement: d4nj03313b1.pdf [file d4nj03313b1.pdf]

## **Refining Mn-Ni Synergy for the Design of Efficient Catalysts in Electrochemical Ethanol Oxidation**

Qitong Zhong,<sup>a</sup> Xing Tan,<sup>a</sup> Ruixing Du,<sup>a</sup> Longfei Liao,<sup>b</sup> Zhenchen Tang,<sup>a</sup> Shiming Chen,<sup>c</sup> Dafeng Yan,<sup>d</sup> Feng Zeng<sup>a,\*</sup>

<sup>a</sup> State Key Laboratory of Materials-Oriented Chemical Engineering, College of Chemical Engineering, Nanjing Tech University, Nanjing 211816, Jiangsu, China

<sup>b</sup> School of Materials Science and Engineering, Harbin Institute of Technology (Shenzhen), Shenzhen 518055, Guangdong, China

<sup>c</sup> School of Intelligent Medicine, China Medical University, Shenyang 110122, Liaoning, China

<sup>d</sup> College of Chemistry and Chemical Engineering, Hubei University, Wuhan 430062, China

\* Corresponding author: zeng@njtech.edu.cn

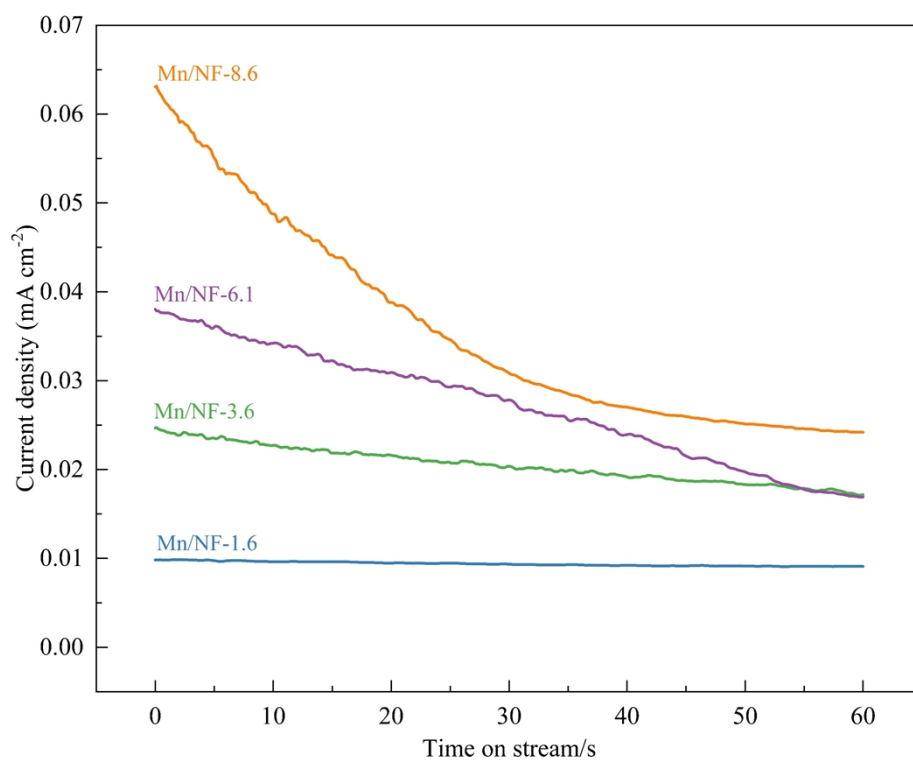

Figure S1. Electrochemical deposition current density over various Mn/NF electrodes.

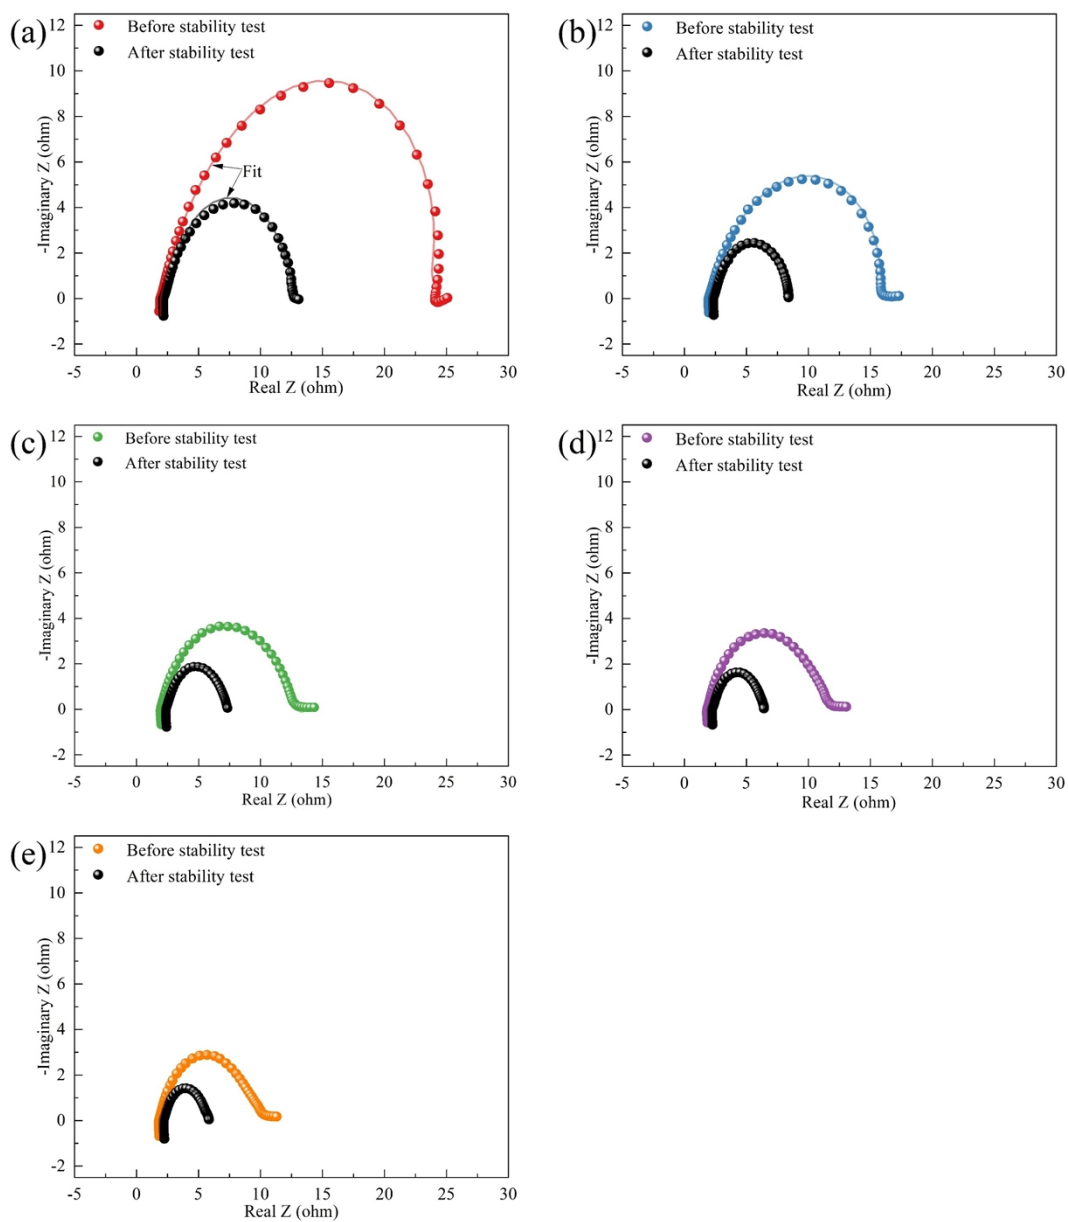

Figure S2. Comparison of Nyquist plots before and after stability test over Mn/NF-0 (a), Mn/NF-1.6 (b), Mn/NF-3.6 (c), Mn/NF-6.1 (d), and Mn/NF-8.6 (e) electrodes. In an electrolyte with 1M KOH and 1 M ethanol, at  $50 \text{ mV s}^{-1}$ .

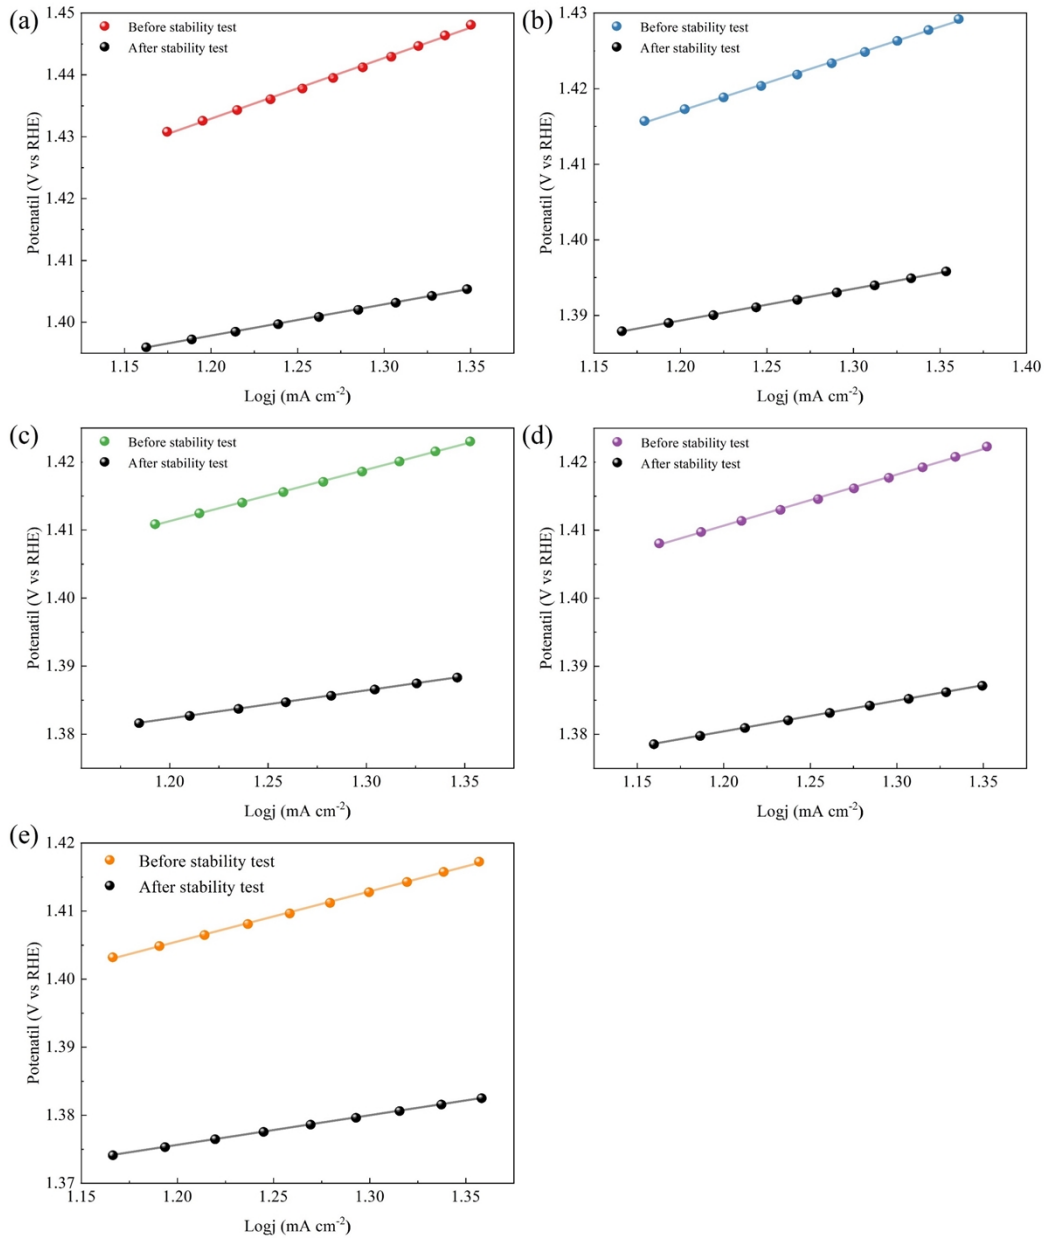

Figure S3. Comparison of Tafel plots before and after stability test over Mn/NF-0 (a), Mn/NF-1.6 (b), Mn/NF-3.6 (c), Mn/NF-6.1 (d), and Mn/NF-8.6 (e) electrodes. In an electrolyte with 1M KOH and 1 M ethanol, at 10 mV s<sup>-1</sup>. The potentials are IR compensated.

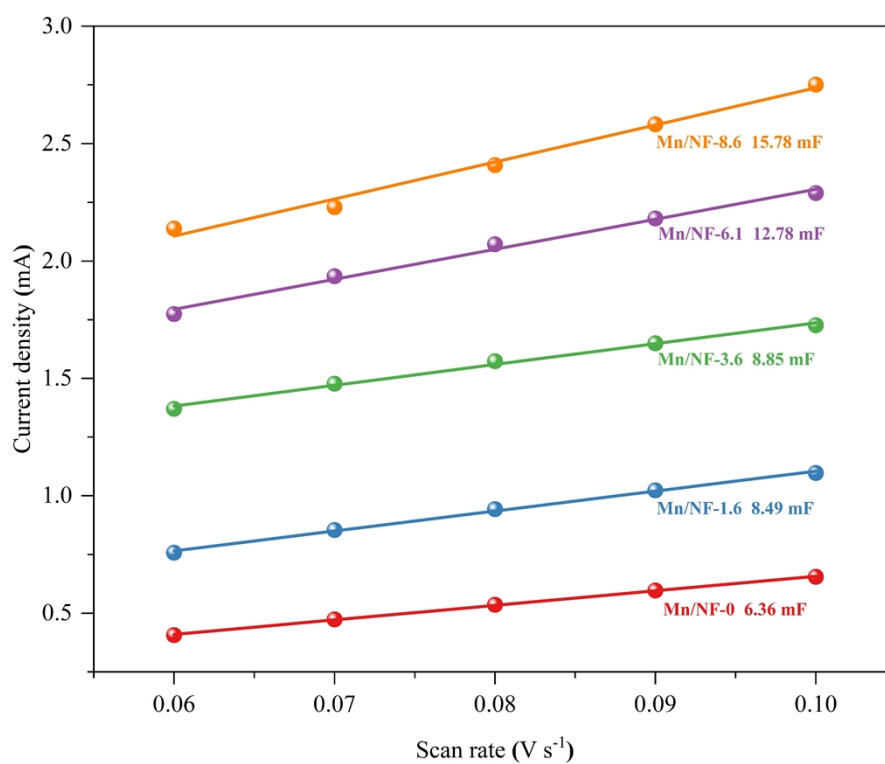

Figure S4. Double-layer capacitance measurements for determining ECSA for various Mn/NF electrodes in 1mol L<sup>-1</sup> KOH with 1mol L<sup>-1</sup> EtOH.

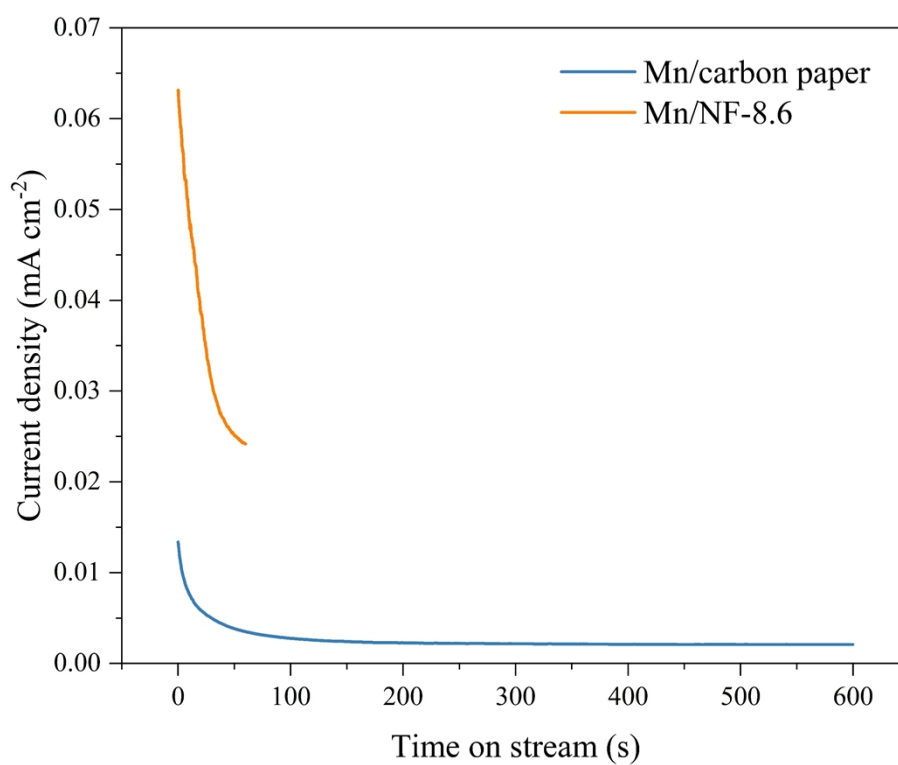

Figure S5. Electrochemical deposition current density over Mn/NF-6.1 and Mn/carbon paper. As the deposition current density over carbon paper is much lower, a longer deposition time was applied.

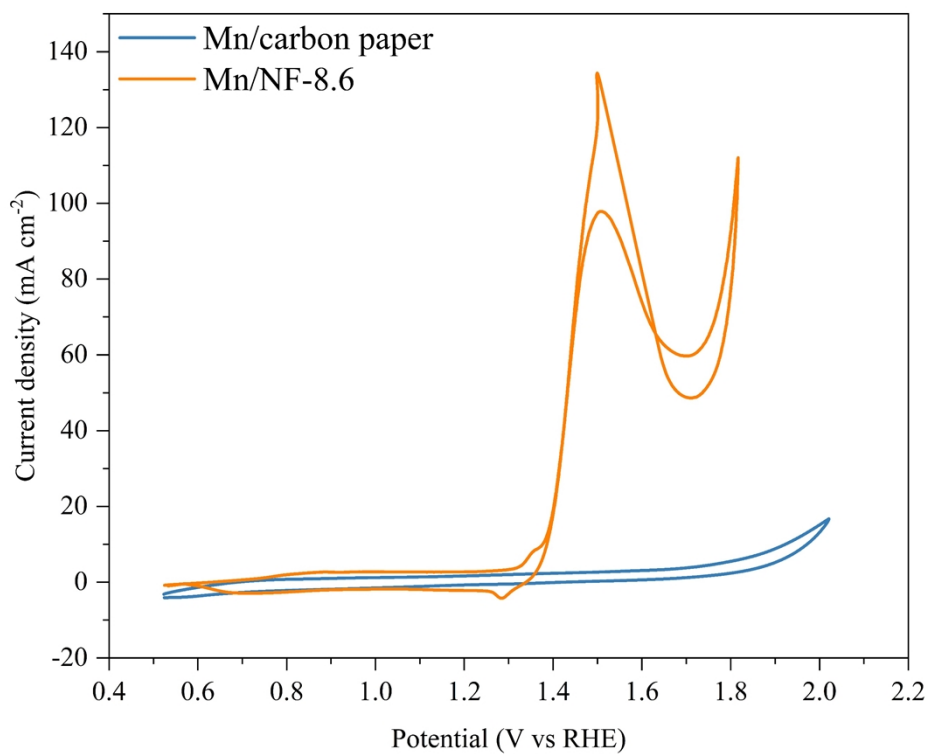

Figure S6. CV curves for ethanol oxidation over Mn/NF-6.1 and Mn/carbon paper. In an electrolyte with 1M KOH and 1 M ethanol, at 50 mV s<sup>-1</sup>. The potentials are IR compensated.

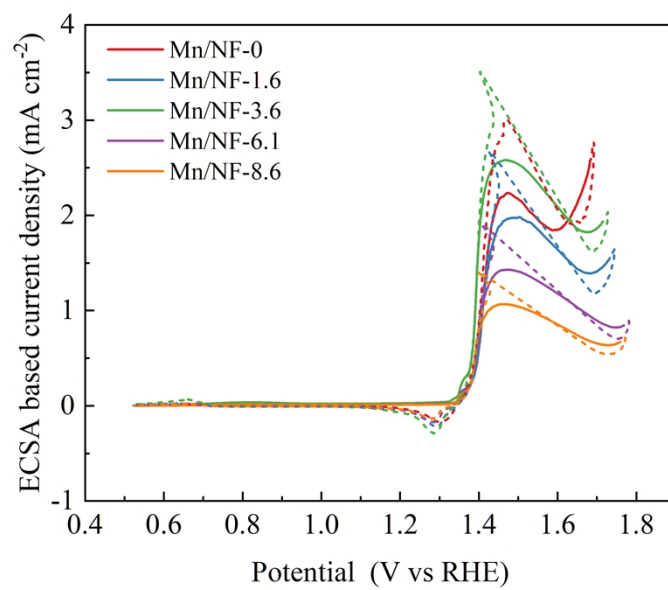

Figure S7. ECSA-based CV curves obtained at the Mn/Ni electrode after stability testing.



Table S1. Binding energies for Mn<sup>3+</sup> and Mn<sup>4+</sup>, as well as the Mn<sup>3+</sup>/Mn<sup>4+</sup> and (O<sub>ad</sub>+O-H<sub>ad</sub>)/O<sub>L</sub> ratio.

|           | BE <sup>a</sup> for Mn <sup>3+</sup><br>(eV) | BE for Mn <sup>4+</sup><br>(eV) | Mn <sup>3+</sup> /Mn <sup>4+</sup><br>ratio | M-OH/M-O ratio |
|-----------|----------------------------------------------|---------------------------------|---------------------------------------------|----------------|
| NF/Mn-1.6 | 642.27                                       | 644.71                          | 1.97                                        | 0.66           |
| NF/Mn-3.6 | 642.33                                       | 644.75                          | 1.85                                        | 0.81           |
| NF/Mn-6.1 | 642.31                                       | 644.64                          | 1.77                                        | 1.18           |
| NF/Mn-8.6 | 642.33                                       | 644.65                          | 1.72                                        | 1.30           |

<sup>a</sup> Binding energy.
